# Supplementary material for: TGFBI secreted by tumor-associated macrophages promotes glioblastoma stem cell-driven tumor growth via integrin αvβ5-Src-Stat3 signaling
Source: PubMed Central journal article supplement (PMC9169371; doi:10.7150/thno.69605), 2022-05-16
Supplement: thnov12p4221s1.pdf [file thnov12p4221s1.pdf]

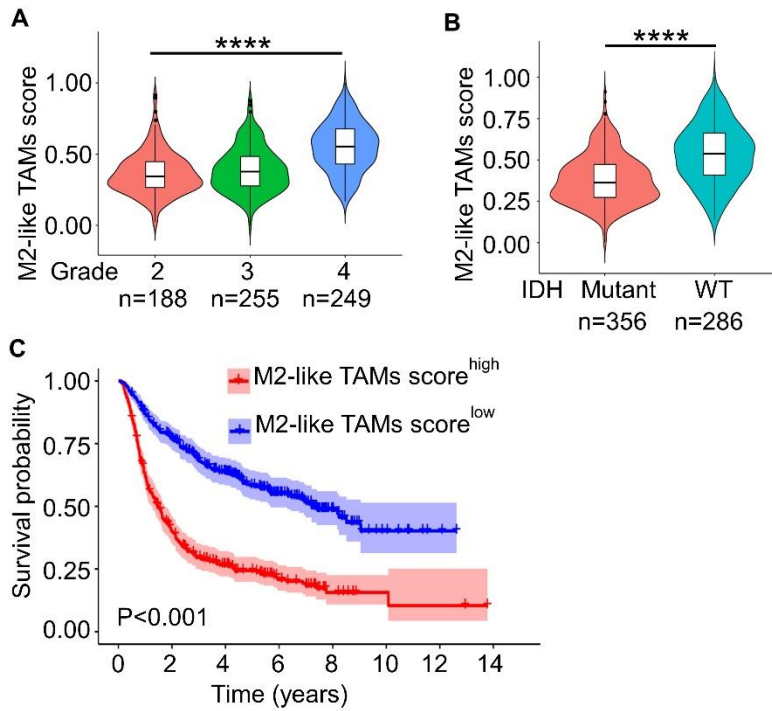

**Figure S1. M2-like TAMs infiltrate in CGGA cohort.**

(A) ssGSEA of M2-like TAMs signature genes in CGGA-glioma dataset showed M2-like TAMs signature score increased with higher grade gliomas. \*\*\*\* $P < 0.0001$ , ANOVA, analysis of variance. (B) Violin plot of M2-like TAMs signature score in IDH-WT and IDH-mutant gliomas from the CGGA database. \*\*\*\* $P < 0.0001$ , Student's t-test. (D) Kaplan–Meier survival plots of M2-like TAMs signature score showed a higher score indicated a poorer prognosis.  $P < 0.001$ , log-rank test.

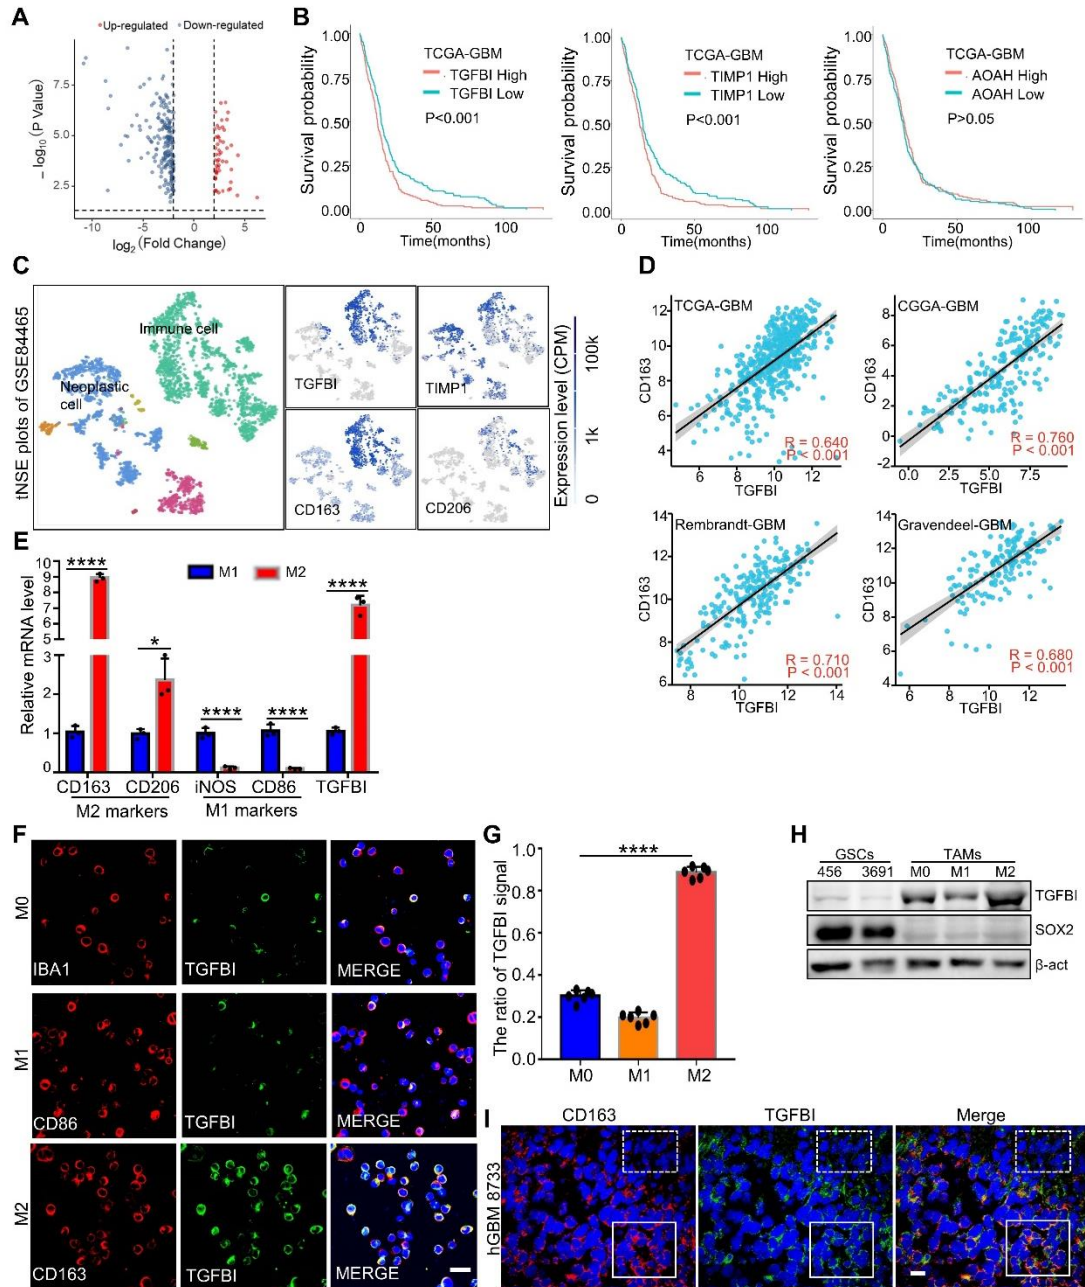

**Figure S2. TGFBI is preferentially secreted by M2-like TAMs and indicates a poor prognosis in GBM patients.**

(A) The volcano plot shows the differentially expressed genes in GSE37475 (fold change  $\geq 2$ ) [1]. (B) Kaplan-Meier survival plots of TGFBI, TIMP1, AOAHP of TCGA-GBM patients. Statistical test: Log-rank test. (C) t-SNE analysis of 3533 cells of 4 glioma patients (GSE84465) [2]. Differential coloring in cell clusters is annotated according to the dominant cell type (left). Expression of cell-type-specific TGFBI, TIMP1, CD163 and CD206 overlaid on the t-SNE space (right). (D) Correlation analyses of TGFBI and CD163 in TCGA-GBM, CGGA-GBM, Rembrandt-GBM, Gravendeel-GBM databases. Pearson's  $r$  test. (E) qRT-PCR analyses of the expressions of M2 markers (CD163 and CD206), M1 markers (iNOS and CD86) and TGFBI between primed-U937 and the U937-derived M2-like TAMs.  $*p < 0.05$ ,  $****p <$

0.0001, Student's t-test. (F) Immunofluorescent staining of TGFBI and IBA1, CD86, CD163 in M0, M1 and M2 macrophages. Scale bar represents 50  $\mu\text{m}$ . (G) The quantification of the TGFBI signal is shown. \*\*\*\* $p < 0.01$ , ANOVA, analysis of variance. (H) Immunoblot analysis of TGFBI in GSCs (456 and 3691) and TAMs. (I) Representative immunofluorescent (IF) staining of TGFBI and the M2-like TAM marker (CD163) in human GBM tissues. Areas indicated with solid and dashed square lines respectively represent the CD163 high and low expression groups. Scale bar represents 20  $\mu\text{m}$ .

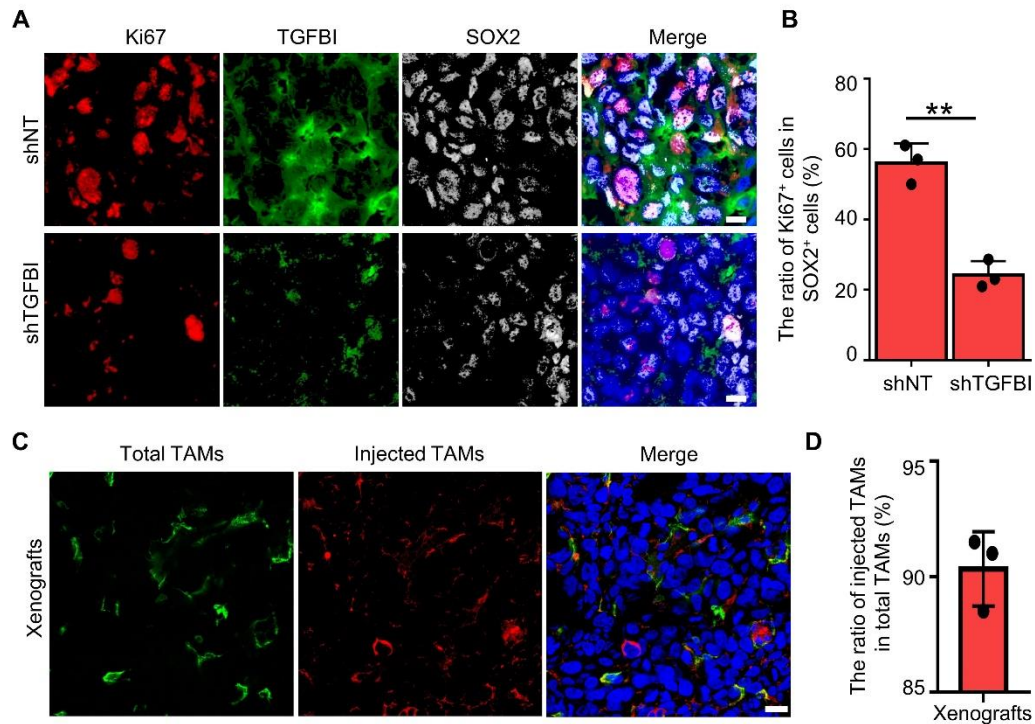

**Figure S3 TGFBI is distributed around GSCs and mediates the pro-tumorigenic effect of M2-like TAMs.**

(A) Representative IF images of Ki67, TGFBI, and SOX2 in mouse models. Scale bar represents 10  $\mu$ m. (B) The ratio of Ki67<sup>+</sup> cells in SOX2<sup>+</sup> cells.  $n = 3$ , \*\* $p < 0.01$ , Student's t-test. (C) Representative IF images of total TAMs (labeled with CD163 antibody recognizes human and murine-derived antigen) and injected TAMs (labeled with CD163 antibody recognizes human-derived antigen) in mouse models. Scale bar represents 20  $\mu$ m. (D) The statistical result indicated the injected TAMs (human-derived TAMs) account for about 90% of the total TAMs (human and murine-derived TAMs),  $n = 3$ .

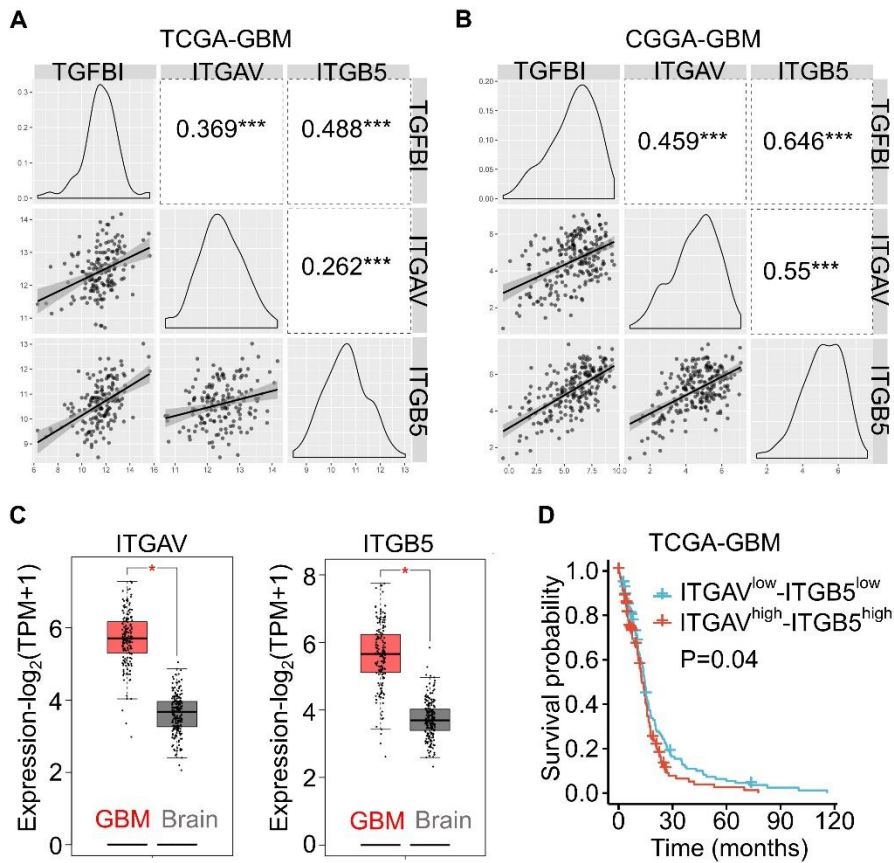

**Figure S4 Integrin  $\alpha v \beta 5$  is a receptor for TGFBI on GSCs.**

(A, B) The correlation analyses of ITGAV, ITGB5, and TGFBI expression in TCGA-GBM (A) and CGGA-GBM (B) databases. \*\*\* $p < 0.001$ , Pearson's  $r$  test. (C) The mRNA levels of ITGAV and ITGB5 between matched TCGA GBM and normal brain from the genotype-tissue expression (GTEx) dataset. \* $p < 0.05$ , Student's  $t$ -test. (D) Kaplan- Meier survival plots of ITGAV and ITGB5 of TCGA-GBM patients.  $P=0.04$ , log-rank test.

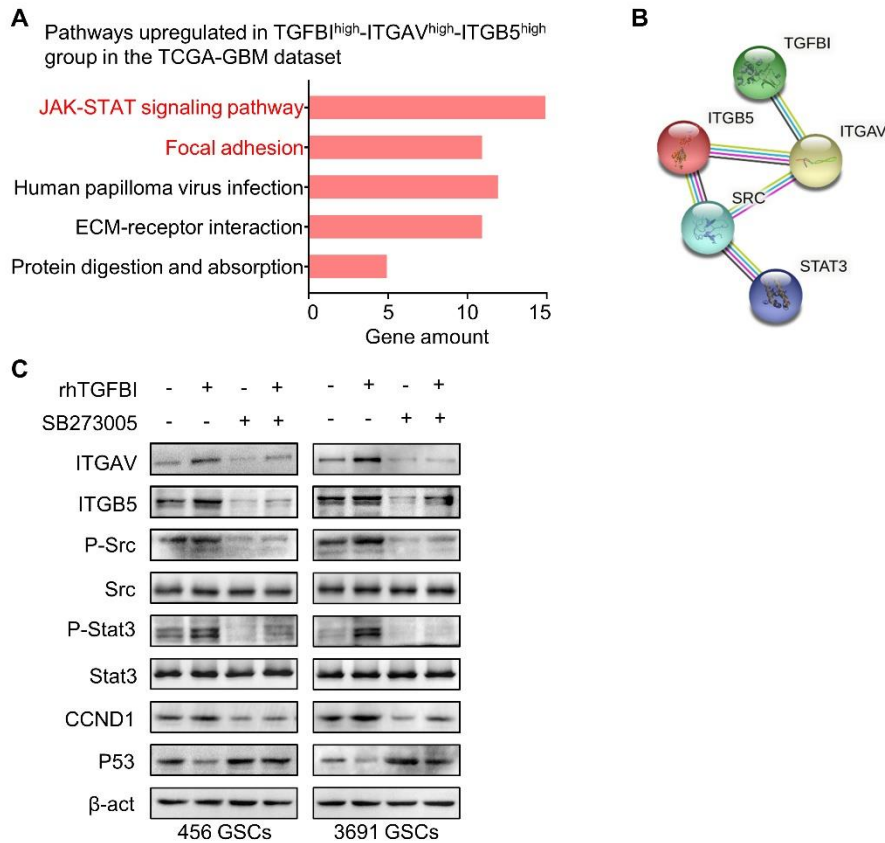

**Figure S5. TGFBI mediates the pro-tumorigenic effect via the integrin  $\alpha\beta 5$ -Src-Stat3 axis.**

(A) KEGG pathways were enriched with TGFBI<sup>high</sup>-ITGAV<sup>high</sup>-ITGB5<sup>high</sup> in TCGA-GBM. (B) The protein-protein interaction (PPI) network of TGFBI-ITGAV-ITGB5-Src-Stat3 was built using STRING (<http://string-db.org/>). (C) Immunoblot analyses of ITGAV, ITGB5, phospho-Src (P-Src-Y527), total Src, phospho-Stat3 (P-Stat3-Y705), total Stat3, P53 and CCND1 in 456GSCs and 3691GSCs, indicated that rhTGFBI stimulation significantly increased Src and Stat3-activating phosphorylation, while the inhibitor of ITGAV and ITGB5 (SB273005) compromised rhTGFBI-stimulated P-Src and P-Stat3 activation in GSCs.

Table S1 The list of chemicals.

| <b>Chemicals</b>                                 | <b>Source</b>     | <b>Identifier</b> |
|--------------------------------------------------|-------------------|-------------------|
| PMA                                              | Sigma-Aldrich     | P1585             |
| LPS                                              | Sigma-Aldrich     | L4516             |
| IFN- $\gamma$                                    | Peprotech         | AF300-02          |
| IL4                                              | Peprotech         | AF200-04          |
| IL10                                             | Peprotech         | AF200-10          |
| TGF- $\beta$                                     | Peprotech         | AF100-21C         |
| EGF                                              | R&D               | Cat#236-EG        |
| bFGF                                             | R&D               | Cat#4114-TC       |
| Fetal bovine serum                               | Gbico             | 10099141C         |
| protease and phosphatase inhibitors              | Thermo Scientific | Cat# 78442        |
| ChamQ SYBR Master Mix                            | Vazyme            | Cat# Q311-02/03   |
| HiScript II Q RT SuperMix for qPCR (+gDNA wiper) | Vazyme            | Cat# R223-01      |
| B27                                              | BasalMedia        | S441J7            |
| Neurobasal media                                 | BasalMedia        | X087G1            |
| Sodium pyruvate                                  | BasalMedia        | Cat# 11360070     |
| Glutamax                                         | BasalMedia        | Cat# 35050061     |
| penicillin/streptomycin                          | BasalMedia        | S110JV            |
| RPMI Medium 1640 basic                           | Gbico             | Cat# 11875093     |
| Triton X-100                                     | Solarbio          | Cat# T8200        |
| SB273005                                         | Selleck           | S7540             |

Table S2 The clinical information of the six human GBM specimens.

| <b>Specimen</b> | <b>Histopathology</b> | <b>WHO Grade</b> | <b>Gender</b> | <b>Age (years)</b> | <b>Predominant side of tumor location</b> | <b>Predominant lobe of tumor location</b> | <b>Extent of surgical resection</b> |
|-----------------|-----------------------|------------------|---------------|--------------------|-------------------------------------------|-------------------------------------------|-------------------------------------|
| GBM5336         | GBM                   | 4                | Male          | 64                 | Left                                      | Temporal                                  | TR                                  |
| GBM3871         | GBM                   | 4                | Female        | 49                 | Right                                     | Temporal                                  | TR                                  |
| GBM4698         | GBM                   | 4                | Female        | 46                 | Left                                      | Temporal                                  | TR                                  |
| GBM7611         | GBM recurrent         | 4                | Female        | 56                 | Right                                     | Parietal                                  | GTR                                 |
| GBM8733         | GBM                   | 4                | Male          | 54                 | Left                                      | Temporal                                  | TR                                  |
| GBM7715         | GBM recurrent         | 4                | Female        | 45                 | Right                                     | Frontal                                   | TR                                  |

Abbreviations: GBM, Glioblastoma; TR, Total resection; GTR, Gross total resection.



Table S3 The clinical information of the 78 gliomas.

| <b>TMA number</b> | <b>Gender</b> | <b>Age (year)</b> | <b>WHO grade</b> | <b>Survival time (month)</b> | <b>Survival state</b> |
|-------------------|---------------|-------------------|------------------|------------------------------|-----------------------|
| 1                 | Male          | 63                | 2                | 13.32                        | Dead                  |
| 2                 | Male          | 47                | 4                | 4.80                         | Dead                  |
| 3                 | Male          | 33                | 3                | 21.37                        | Dead                  |
| 4                 | Male          | 44                | 4                | NA                           | NA                    |
| 5                 | Female        | 73                | 4                | 42.08                        | Alive                 |
| 6                 | Male          | 55                | 4                | 9.24                         | Dead                  |
| 7                 | Male          | 63                | 4                | 5.92                         | Dead                  |
| 8                 | Male          | 58                | 4                | 8.52                         | Dead                  |
| 9                 | Female        | 47                | 2                | 36.36                        | Alive                 |
| 10                | Female        | 44                | 2                | 36.07                        | Alive                 |
| 11                | Male          | 65                | 4                | 15.78                        | Dead                  |
| 12                | Male          | 68                | 4                | 18.12                        | Dead                  |
| 13                | Male          | 35                | 4                | NA                           | NA                    |
| 14                | Female        | 42                | 2                | 35.38                        | Alive                 |
| 15                | Male          | 30                | 4                | 35.34                        | Alive                 |
| 16                | Female        | 35                | 2                | 34.49                        | Alive                 |
| 17                | Female        | 53                | 2                | 34.49                        | Alive                 |
| 18                | Male          | 48                | 4                | 1.35                         | Dead                  |
| 19                | Male          | 47                | 2                | 34.19                        | Alive                 |
| 20                | Female        | 44                | 2                | 34.16                        | Alive                 |
| 21                | Male          | 46                | 2                | 29.36                        | Dead                  |
| 22                | Female        | 43                | 3                | NA                           | NA                    |
| 23                | Male          | 60                | 4                | 13.87                        | Dead                  |
| 24                | Male          | 65                | 4                | 11.51                        | Dead                  |
| 25                | Female        | 56                | 3                | 13.48                        | Dead                  |
| 26                | Female        | 50                | 2.3              | NA                           | NA                    |
| 27                | Female        | 50                | 4                | NA                           | NA                    |
| 28                | Male          | 50                | 4                | NA                           | NA                    |
| 29                | Female        | 42                | 4                | 6.64                         | Dead                  |
| 30                | Male          | 45                | 3                | 28.77                        | Alive                 |
| 31                | Male          | 44                | 4                | 13.18                        | Dead                  |
| 32                | Male          | 46                | 4                | 28.47                        | Alive                 |
| 33                | Female        | 51                | 4                | 9.40                         | Dead                  |
| 34                | Male          | 65                | 4                | 16.34                        | Dead                  |
| 35                | Male          | 62                | 4                | 14.50                        | Dead                  |
| 36                | Female        | 36                | 2                | 27.48                        | Alive                 |
| 37                | Female        | 35                | 4                | 18.67                        | Dead                  |
| 38                | Male          | 30                | 4                | NA                           | NA                    |
| 39                | Male          | 65                | 4                | 6.90                         | Dead                  |
| 40                | Male          | 11y5m             | 4                | 10.75                        | Dead                  |

|    |        |      |     |       |       |
|----|--------|------|-----|-------|-------|
| 42 | Female | 26   | 4   | 24.36 | Dead  |
| 43 | Male   | 43   | 4   | 2.89  | Dead  |
| 44 | Male   | 61   | 4   | 9.53  | Dead  |
| 45 | Female | 38   | 2   | 24.72 | Alive |
| 46 | Female | 38   | 4   | 21.80 | Alive |
| 47 | Female | 54   | 4   | 16.93 | Dead  |
| 48 | Male   | 46   | 4   | 23.61 | Alive |
| 49 | Female | 48   | 3   | 2.73  | Dead  |
| 50 | Male   | 31   | 2   | 18.87 | Alive |
| 51 | Female | 47   | 3   | NA    | NA    |
| 52 | Male   | 55   | 4   | 18.31 | Alive |
| 53 | Female | 37   | 2.3 | 17.62 | Alive |
| 54 | Male   | 53   | 4   | 30.31 | Alive |
| 55 | Male   | 47   | 2   | 35.34 | Alive |
| 56 | Male   | 31   | 2   | 34.26 | Alive |
| 57 | Male   | 49   | 4   | 13.78 | Alive |
| 58 | Female | 50   | 4   | 18.77 | Alive |
| 59 | Female | 9    | 3   | 15.81 | Alive |
| 60 | Male   | 46   | 4   | 10.45 | Dead  |
| 61 | Female | 62   | 4   | 10.78 | Dead  |
| 62 | Male   | 1y6m | 3.4 | 21.14 | Alive |
| 63 | Female | 32   | 2.3 | 0.33  | Alive |
| 64 | Female | 55   | 4   | 6.87  | Dead  |
| 66 | Male   | 34   | 2   | 23.21 | Alive |
| 67 | Female | 34   | 2   | 2.86  | Dead  |
| 68 | Male   | 69   | 4   | 11.64 | Dead  |
| 69 | Female | 57   | 4   | NA    | NA    |
| 70 | Male   | 17   | 3   | NA    | NA    |
| 71 | Male   | 45   | 2   | NA    | NA    |
| 73 | Female | 55   | 3.4 | 3.68  | Dead  |
| 74 | Female | 59   | 2.3 | 13.94 | Dead  |
| 75 | Male   | 48   | 2   | NA    | NA    |
| 76 | Male   | 52   | 2   | 16.14 | Dead  |
| 77 | Male   | 40   | 2   | 31.96 | Alive |
| 78 | Male   | 56   | 4   | 4.83  | Dead  |
| 79 | Female | 61   | 2   | NA    | NA    |
| 80 | Male   | 1y8m | 2   | 26.89 | Alive |
| 81 | Male   | 16   | 3   | NA    | NA    |

Abbreviations: NA, Not available

Table S4 The list of antibodies.

| <b>Antibodies</b> | <b>Source</b>  | <b>Identifier</b> |
|-------------------|----------------|-------------------|
| P-stat3 Y705      | Cell Signaling | 9145S             |
| Stat3             | Cell Signaling | 9139S             |
| P-src Y527        | Cell Signaling | 2105S             |
| Src               | Cell Signaling | 2109S             |
| CCND1             | Cell Signaling | 2978T             |
| Ki67              | Proteintech    | 27309-1-AP        |
| P53               | Santa cruz     | SC126(D0-1)       |
| TGFBI             | Proteintech    | 60007-1-Ig        |
| TGFBI             | Proteintech    | 10188-1-AP        |
| TGFBI             | Abclone        | A11222            |
| TGFBI             | Abcam          | ab170874          |
| CD206             | Proteintech    | 60143-1-Ig        |
| CD163             | Santa cruz     | SC-33715          |
| CD163             | Proteintech    | 16646-1-AP        |
| IBA1              | Cell Signaling | 17198S            |
| ITGAV             | Abclone        | A2091             |
| ITGB5             | Cell Signaling | 3629S             |
| SOX2              | Proteintech    | 66411-1-Ig        |
| Olig2             | Proteintech    | 66513-1-Ig        |
| CD133             | Affinity       | BF0403            |
| GFAP              | Cell Signaling | 80788             |
| CD86              | Proteintech    | 13395-1-AP        |
| iNOS              | Proteintech    | 18985-1-AP        |
| SOX2              | Abcam          | ab196637          |

Table S5 Short hairpin RNA sequences used for lentiviral vector construction

|        | <b>Source</b> | <b>Identifier</b> | <b>Sequence (5' to 3')</b>     |
|--------|---------------|-------------------|--------------------------------|
| shTGF  | Sigma-        | TRCN000           | CCGGGCGCTTGAGATCTTCAAACAACCTCG |
| BI-417 | Aldrich       | 0291417           | AGTTGTTTGAAGATCTCAAGCGCTTTTTG  |
| shTGF  | Sigma-        | TRCN000           | CCGGAGAAGGTTATTGGCACTAATACTCG  |
| BI-419 | Aldrich       | 0291419           | AGTATTAGTGCCAATAACCTTCTTTTTTG  |
| shITG  | Sigma-        | TRCN000           | CCGGGTGAGGTCGAAACAGGATAAACTC   |
| AV-1   | Aldrich       | 0010768           | GAGTTTATCCTGTTTCGACCTCACTTTTT  |
| shITG  | Sigma-        | TRCN000           | CCGGCGACAGGCTCACATTCTACTTCTCG  |
| AV-3   | Aldrich       | 0010769           | AGAAGTAGAATGTGAGCCTGTCGTTTTT   |

Table S6 The list of primer sequences used for the qRT-PCR.

| <b>Gene</b>  | <b>Forward primer (5' to 3')</b> | <b>Reverse primer (5' to 3')</b> |
|--------------|----------------------------------|----------------------------------|
| <i>TGFBI</i> | ATGACCCTCACCTCTATGTACC           | CACAGTTCACAGTTACAATCCCA          |
| <i>CD163</i> | CATGTCTCTGAGGCTGACCA             | TGCACACGATCTACCCACAT             |
| <i>CD206</i> | TACCTGAGCCACACCTGCT              | GCGCGTTGTCCATGGTTTCC             |
| <i>CD86</i>  | CCCGGATGGTGTGTGGCATA             | TCACAAGGAGGAGGGCCACA             |
| <i>iNOS</i>  | TTCAGTATCACAACCTCAGCAAG          | TGGACCTGCAAGTTAAAATCCC           |
| <i>SOX2</i>  | TACAGCATGTCCTACTCGCAG            | GAGGAAGAGGTAACCACAGGG            |
| <i>GFAP</i>  | CTGCGGCTCGATCAACTCA              | TCCAGCGACTCAATCTTCCTC            |
| <i>ITGAV</i> | GCTGTGCGGAGATTTCAATGGT           | TCTGCTCGCCAGTAAAATTGT            |
| <i>ITGA3</i> | CTACCACAACGAGATGTGCAA            | CCGAAGTACACAGTGTTCTGG            |
| <i>ITGA5</i> | GGCTTCAACTTAGACGCGGAG            | TGGCTGGTATTAGCCTTGGGT            |
| <i>ITGA6</i> | GGCGGTGTTATGTCCTGAGTC            | AATCGCCCATCACAAAAGCTC            |
| <i>ITGB1</i> | GTGTGGAAGTGGTCTACCTGG            | CAGCAGCGAGTTCTGAATGTC            |
| <i>ITGB3</i> | AATCTCCTGTGCATCACATTTCT          | TTCATAGCTGTCAAGATGACGTG          |
| <i>ITGB5</i> | TCTCGGTGTGATCTGAGGG              | TGGCGAACCTGTAGCTGGA              |
| <i>ACTB</i>  | CTCCTCCGAGTCAACAGATTCA           | CAACAGCTTCTGAGGTAGGGA            |
| <i>GAPDH</i> | AAGGTGAAGGTCGGAGTCAAC            | GGGGTCATTGATGGCAACAATA           |

## References

- [1]. Pyonteck SM, Akkari L, Schuhmacher AJ, *et al.* CSF-1R inhibition alters macrophage polarization and blocks glioma progression. *Nat Med.* 2013 **19**: 1264-1272.
- [2]. Darmanis S, Sloan SA, Croote D, *et al.* Single-Cell RNA-Seq Analysis of Infiltrating Neoplastic Cells at the Migrating Front of Human Glioblastoma. *Cell reports.* 2017 **21**: 1399-1410.
